# Supplementary material for: Endocarditis and biofilm-associated pili of Enterococcus faecalis
Source: JCI journal article supplement (doi:10.1172/jci29021), 2006-10-02
Supplement: sd1 [file 1]

## Supplemental Methods

*Bacterial strains.* A total of 408 *E. faecalis* strains isolated over 30 years from diverse locations (Argentina, Belgium, Canada, Chile, China, France, Lebanon, Spain, Thailand, UK, and USA) were included. These isolates include ones from endocarditis (82), urine (92), other clinical specimens (121), stool isolates from hospitalized patients (58), community-derived human fecal isolates (33), and animal isolates (22). The sources of other clinically-derived strains include blood, bile, bone, catheters, cervix, cerebrospinal fluid, placenta, peritoneal fluid, sputum, and several types of wounds, among others. All the *E. faecalis* isolates used in this study were initially identified to species level by biochemical tests and were confirmed by colony hybridization (1) using an intragenic *ace* probe (2, 3). To study the presence of *ebpA*, *ebpB*, and *ebpC*, respective intragenic fragments were amplified (using primer pairs Ef1091F and Ef1091R, Ef1092F and Ef1092R, and, Ef1093F and Ef1093R, respectively (Supplemental Table 2)) by PCR, labeled with <sup>32</sup>P and used as probes for colony hybridization.

*Construction of srtC deletion mutant of E. faecalis OG1RF.* To delete the 855-bp *srtC* gene of OG1RF, a crossover PCR deletion product containing the *srtC* upstream and downstream regions was made in two steps as described earlier (4). The crossover PCR product was purified, digested with PstI and XbaI, and ligated with similarly digested pTEX4577. A correct construct, designated as pTEX5468, was then introduced into electrocompetent cells of OG1RF and the cells were then plated on kanamycin to select for single crossover integration. Primer sets Ef1094delUpF and T7 as well as Ef1094delDnR and T3 (Supplemental Table 2) were used for verifying integration into the left or right regions, respectively. One of the recombinants was picked and was grown for six daily serial passages at 37°C. The culture from the sixth passage was serially diluted and plated at 37°C on non-selective media. To detect plasmid excision by

double crossover recombination, these master plates were then replica plated to BHI plates and BHI plus kanamycin plates to identify colonies that had lost the kanamycin resistance gene of the vector. The deletion mutant was differentiated from a wild-type revertant by PCR with primers Ef1094delUpF and Ef1094delDnR and the strain identity was confirmed by PFGE. One of these colonies with the correct deletion was designated as TX5470 (OG1RF $\Delta$ *srtC*). Southern hybridizations using the deleted fragment of *srtC* as a probe and sequencing of the Ef1094delUpF and Ef1094delDnR PCR product with primer Ef1093DownFa (Supplemental Table 2) confirmed the correct deletion.

*Construction of ebpA allelic replacement mutation.* Construction of TX5475 involved deletion of *ebpA* with substitution of a kanamycin resistance gene cassette in its place. The crossover PCR deletion products that were used to delete the *ebpA* gene from OG1RF contained the *ebpA* upstream and downstream regions joined by a kanamycin resistance cassette between them. The crossover PCR product was cloned into pTEX4594 (Supplemental Table 1). A correct construct, designated as pTEX5473, was then introduced into electrocompetent cells of OG1RF and the cells were then plated on kanamycin and erythromycin to select for single crossover integration. Appropriate primer sets (Supplemental Table 1) were used for verifying integration into the left or right regions, respectively. One of the integrants grown for several serial passages was serially diluted and plated at 37°C on non-selective media. To detect plasmid excision following a second crossover recombination, replica plating was used. The deletion mutant TX5475 (OG1RF $\Delta$ *ebpA*) was confirmed by PFGE, Southern hybridization, and sequencing, as above.

**Supplemental Table 1** Bacterial strains and plasmids used in this study

| Strains/Plasmids   | Relevant characteristics <sup>a</sup>                                                                                                                                       | Reference or source |
|--------------------|-----------------------------------------------------------------------------------------------------------------------------------------------------------------------------|---------------------|
| Strains            |                                                                                                                                                                             |                     |
| <i>E. faecalis</i> |                                                                                                                                                                             |                     |
| OG1RF              | Laboratory strain; BF <sup>+</sup> ; Ery <sup>s</sup> , Fus <sup>r</sup> , Kan <sup>s</sup> , Rif <sup>f</sup>                                                              | (5)                 |
| TX5421             | OG1RF <i>ebpA</i> ::pTEX5367; <i>ebpA</i> (ef1091) insertion disruption mutant of OG1RF; BF <sup>-</sup> ; Fus <sup>r</sup> , Kan <sup>r</sup> , Rif <sup>f</sup>           | This study          |
| TX5460             | OG1RF <i>ebpB</i> ::pTEX5372; <i>ebpB</i> (ef1092) insertion disruption mutant of OG1RF; BF <sup>-</sup> ; Fus <sup>r</sup> , Kan <sup>r</sup> , Rif <sup>f</sup>           | This study          |
| TX5448             | OG1RF <i>ebpC</i> ::pTEX5445; <i>ebpC</i> (ef1093) insertion disruption mutant of OG1RF; BF <sup>-</sup> ; Fus <sup>r</sup> , Kan <sup>r</sup> , Rif <sup>f</sup>           | This study          |
| TX5470             | OG1RFΔ <i>srtC</i> ; <i>srtC</i> deletion mutant of OG1RF; BF <sup>-</sup> ; Fus <sup>r</sup> , Rif <sup>f</sup>                                                            | This study          |
| TX5475             | OG1RFΔ <i>ebpA</i> ; <i>ebpA</i> allelic replacement <i>aph(3')</i> - <i>IIIa</i> mutant of OG1RF; BF <sup>-</sup> ; Fus <sup>r</sup> , Kan <sup>r</sup> , Rif <sup>f</sup> | This study          |
| TX5482             | TX5448 harboring plasmid pMSP3545; Kan <sup>r</sup> , Ery <sup>r</sup> (control for complementation)                                                                        | This study          |
| TX5476             | TX5448 harboring plasmid pTEX5472; Kan <sup>r</sup> , Ery <sup>r</sup> (for complementation with the <i>ebpC</i> gene)                                                      | This study          |
| TX5479             | TX5448 harboring plasmid pTEX5478; Kan <sup>r</sup> , Ery <sup>r</sup> (for complementation with <i>ebpC</i> and <i>srtC</i> genes)                                         | This study          |
| TX5491             | TX5470 harboring plasmid pMSP3545; Ery <sup>r</sup> (control for complementation)                                                                                           | This study          |
| TX5493             | TX5470 harboring plasmid pTEX5478; Ery <sup>r</sup> (for complementation with <i>ebpC</i> and <i>srtC</i> genes)                                                            | This study          |
| TX5485             | TX5475 harboring plasmid pMSP3545; Kan <sup>r</sup> , Ery <sup>r</sup> (control for complementation)                                                                        | This study          |
| TX5483             | TX5475 harboring plasmid pTEX5472; Kan <sup>r</sup> , Ery <sup>r</sup> (for complementation with the <i>ebpC</i> gene)                                                      | This study          |

|                |                                                                                                                                        |            |
|----------------|----------------------------------------------------------------------------------------------------------------------------------------|------------|
| TX5484         | TX5475 harboring plasmid pTEX5478; Kan <sup>r</sup> , Ery <sup>r</sup><br>(for complementation with <i>ebpC</i> and <i>srtC</i> genes) | This study |
| TX5494         | TX5460 harboring plasmid pMSP3545; Kan <sup>r</sup> , Ery <sup>r</sup><br>(control for complementation)                                | This study |
| TX5495         | TX5460 harboring plasmid pTEX5472; Kan <sup>r</sup> , Ery <sup>r</sup><br>(for complementation with the <i>ebpC</i> gene)              | This study |
| TX5496         | TX5460 harboring plasmid pTEX5478; Kan <sup>r</sup> , Ery <sup>r</sup><br>(for complementation with <i>ebpC</i> and <i>srtC</i> genes) | This study |
| <i>E. coli</i> |                                                                                                                                        |            |
| DH5 $\alpha$   | <i>E. coli</i> host strain for routine cloning                                                                                         | Stratagene |
| TX5367         | DH5 $\alpha$ (pTEX5367); Kan <sup>r</sup>                                                                                              | This study |
| TX5372         | DH5 $\alpha$ (pTEX5372); Kan <sup>r</sup>                                                                                              | This study |
| TX5445         | DH5 $\alpha$ (pTEX5445); Kan <sup>r</sup>                                                                                              | This study |
| TX5468         | DH5 $\alpha$ (pTEX5468); Kan <sup>r</sup>                                                                                              | This study |
| TX5473         | DH5 $\alpha$ (pTEX5473); Kan <sup>r</sup> , Ery <sup>r</sup>                                                                           | This study |
| TX5472         | DH5 $\alpha$ (pTEX5472); Kan <sup>r</sup> , Ery <sup>r</sup>                                                                           | This study |
| TX5478         | DH5 $\alpha$ (pTEX5478); Kan <sup>r</sup> , Ery <sup>r</sup>                                                                           | This study |
| Plasmids       |                                                                                                                                        |            |
| pTEX4577       | Derived from pBluescript SK <sup>-</sup> , used for insertion<br>disruption mutagenesis in enterococci; Kan <sup>r</sup>               | (6)        |
| pTEX4594       | Suicide plasmid derived from pBluescript SK <sup>-</sup> ,<br>used for mutagenesis in enterococci; Ery <sup>r</sup>                    | This study |
| pMSP3545       | Shuttle plasmid used for complementation, with<br>nisin inducible promoter                                                             | (7)        |
| pTEX5367       | Intragenic <i>ebpA</i> fragment cloned into pTEX4577                                                                                   | This study |
| pTEX5372       | Intragenic <i>ebpB</i> fragment cloned into pTEX4577                                                                                   | This study |
| pTEX5445       | Intragenic <i>ebpC</i> fragment cloned into pTEX4577                                                                                   | This study |

|          |                                                                                                                                      |            |
|----------|--------------------------------------------------------------------------------------------------------------------------------------|------------|
| pTEX5468 | Plasmid for <i>srtC</i> deletion; flanking regions of the <i>srtC</i> was cloned contiguously into pTEX4577                          | This study |
| pTEX5473 | Plasmid for <i>ebpA</i> deletion; flanking regions of the <i>ebpA</i> and kanamycin resistance gene were cloned into pTEX4594        | This study |
| pTEX5472 | Construct for complementation; a 1986-bp fragment containing <i>ebpC</i> was cloned into the shuttle vector pMSP3545                 | This study |
| pTEX5478 | Construct for complementation; a 3037-bp fragment containing <i>ebpC</i> and <i>srtC</i> was cloned into the shuttle vector pMSP3545 | This study |

“Fus, fusidic acid; Ery, erythromycin; Kan, kanamycin; Rif, rifampicin; Superscript “s” designates sensitivity, “r” designates resistance; for Kan “r” for enterococci indicates MIC >2000; BF<sup>+</sup>, biofilm positive; BF<sup>-</sup>, biofilm negative

**Supplemental Table 2** Primers used in this study

| <b>Primer Name: sequence (5'→3')<sup>a</sup></b>                                                                | <b>Function<br/>Amplicon</b>                                        |
|-----------------------------------------------------------------------------------------------------------------|---------------------------------------------------------------------|
| Ef1091F: CCGCTCGAGA <u>ACTAACA</u> AAAAATGATTCGGCTCCAG<br>Ef1091R: CCGCTCGAGCCATCTCACGCATTTTATCTTCAACT          | Disruption mutant generation<br>Intragenic <i>ebpA</i>              |
| Ef1092F2: CCGCTCGAGCTGAAGGAAAAACGGTCCAA<br>Ef1092R2: CCGCTCGAGCTTTTGCCTCGTCAGTGTGT                              | Disruption mutant generation<br>Intragenic <i>ebpB</i>              |
| Ef1093F: CCGGAATTCTGATAAATATCAAGGACTGGCAGA<br>Ef1093R: CGGGGTACCTAAGCATACTCTCCAGAAGTCACG                        | Disruption mutant generation<br>Intragenic <i>ebpC</i>              |
| Ef1094Del_1F: AAAACTGCAGTCTGTAAATATTCCATTGGGGATT<br>Ef1094Del_1R: TTTTCGTCATATGCTTCTCCTTAAAAATAAAGCA<br>TGAGAG  | Deletion mutant generation<br>Upstream fragment of <i>srtC</i>      |
| Ef1094Del_2F: GGAGGAAGCATATGACGAAAAGGCTAAACATA<br>CTAAAAAA<br>Ef1094Del_2R: TGCTCTAGAGTACGTTTCGAGGTAATGCTAGGTT  | Deletion mutant generation<br>Downstream fragment of<br><i>srtC</i> |
| Ef1094delUpF: AACAAATCAAACACCTGTTGAAAAA<br>Ef1094delDnR: TCGAAATCCCTATTTGATGCTTAT                               | Mutant confirmation                                                 |
| Ef1091Del_1F: CCGCTCGAGATTTGTTTCTAAAAGAGCGGAAA<br>Ef1091Del_1R: CTATCACCTCGTCTGTTCTCTCTTTCTTTTATGA<br>ATTAA     | Deletion mutant generation<br>Upstream fragment of <i>ebpA</i>      |
| myδKanF: GAGAACAGACGAGGTGATAGGTAAGATTATAACCGA<br>GGTAT<br>myδKanR: TTTTCATTGAGCACGATGATCGTGCCGTGATCGAAA<br>TCCA | Deletion mutant generation<br>Kanamycin resistance gene             |
| Ef1091Del_2F: ATCATCGTGCTCAATGAAAAACGCACGTTGGTTA<br>AGTATT<br>Ef1091Del_2R: TGCTCTAGATGCTTCATTTTCTCTCTCCTCTTT   | Deletion mutant generation<br>Downstream fragment of<br><i>ebpA</i> |
| Ef1091delUpF: AAGTCATTTTCGACTTATGTCCT<br>Ef1091delDnR: AGCCTTCGCTTTTGGAAATAACAA                                 | Mutant confirmation                                                 |
| Ef1091MupF: ATGAAATTTTACGTGCTAGGCAAT<br>Ef1091MR: TATCCGTCTTTTCAATTACAGCA                                       | RT-PCR<br>Upstream of <i>ebpA</i> to 5' end<br>of <i>ebpA</i>       |
| Ef1091MupFa: AGAAATGAAACCGCTTGGTATG                                                                             | RT-PCR<br>Upstream of <i>ebpA</i>                                   |
| Ef1091MF1: AATGTGTTAAACCATCAAGGGAAT<br>Ef1091MR1: ACTCCTTTTGAACCTCACCAATC                                       | RT-PCR<br>Intragenic <i>ebpA</i>                                    |
| Ef1091MF2: TTAACAACAACGTGGGATTGAAATA<br>Ef1091MR2: CACTTCTGGTAATGTTTGAACCTG                                     | RT-PCR<br>Intragenic <i>ebpA</i>                                    |
| Ef1091MDownF: GGGGAAAAAGTAGCAGATGTTTTTA<br>Ef1092MR: AATTGACCATCAGGGAACAATAAT                                   | RT-PCR<br>3' end of <i>ebpA</i> to 5' end of<br><i>ebpB</i>         |

| Primer Name: sequence (5'→3') <sup>a</sup>                                                                                           | Function<br>Amplicon                                            |
|--------------------------------------------------------------------------------------------------------------------------------------|-----------------------------------------------------------------|
| Ef1092MF1: TAAATGGAGAAGATGGAGTGGTTT<br>Ef1092MR1: ACAAACGGAATTCCTGATATCCTA                                                           | RT-PCR<br>Intragenic <i>ebpB</i>                                |
| Ef1092MF2: CAAACAATGACTGTGTCGTATCAA<br>Ef1092MR2a: AGAAGTACTGGCCATCTTTTAAAC                                                          | RT-PCR<br>Intragenic <i>ebpB</i>                                |
| Ef1092MDownF: AGGCTTCTTACCAAAAACAAATGA<br>Ef1093MR : TTCTTTCCCGCTATTTTGAATAAG                                                        | RT-PCR<br>3' end of <i>ebpB</i> to 5' end of<br><i>ebpC</i>     |
| Ef1093MF1: ACAAGCTGTCCAAAGTTTAACTCC<br>Ef1093MR1a : AGCCTTCGCTTTTGGAAATAACAA                                                         | RT-PCR<br>Intragenic <i>ebpC</i>                                |
| Ef1093MF3: TAAAAAATGAGGCGAATGTTGATA<br>Ef1093MR3 : CATCAGCCGTTGTTGTA AAAAGTAG                                                        | RT-PCR<br>Intragenic <i>ebpC</i>                                |
| Ef1093MDownFa: CAGTCTTGCTACTTATTGCAGGAG<br>Ef1094MRa : CAAATGCACCTATTCCAATAATCA                                                      | RT-PCR<br>3' end of <i>ebpC</i> to 5' end of<br><i>srtC</i>     |
| Ef1094MF2: AATGTCCGTTTACCAATTTTTGAT<br>Ef1094MR2 : GGTGTGCAAGTTAATAAAGTGACG                                                          | RT-PCR<br>Intragenic <i>srtC</i>                                |
| Ef1094MF5: TAAAAACCGTTGAACCAACTGATA<br>Ef1094MR5 : GTACCAGATAATGAAGCCGCTAAT                                                          | RT-PCR<br>Intragenic <i>srtC</i>                                |
| Ef1094MF: ATCGGTTATTAGTTCGAGGACATC<br>Ef1094MDownR : AACTTGGCAGGAATTTAAACAGTC                                                        | RT-PCR<br>3' end of <i>srtC</i> to<br>downstream of <i>srtC</i> |
| gdhF: AGTGGCGCACTAAAAGATATGG<br>gdhR : AGTTGTATTGAACCCTTGACCG                                                                        | RT-PCR<br>Intragenic <i>gdh</i>                                 |
| Ef1093ComF2: AAAA <u>CTGCAGC</u> AAAAAAGAGGAGAGAGAAAATG<br>AAGCA<br>Ef1093ComR2: TGCT <u>CTAGATA</u> AAAAATAAAGCATGAAAGCCTGGG<br>ACA | Complementation<br><i>ebpC</i>                                  |
| Ef1093ComF: see above<br>Ef1094ComR2: TGCT <u>CTAGAA</u> ACTTGGCAGGAATTTAAACAGTC                                                     | Complementation<br><i>ebpC</i> and <i>srtC</i>                  |
| Ef1091F: see above<br>Ef1091R: see above                                                                                             | Probe for colony hybridization<br><i>ebpA</i> probe             |
| Ef1092F: CAGAAACCGGTGCAACAAATAGAAAAC<br>Ef1092R: AAAAGACTTGCCGCCTGTACGAACTGT                                                         | Probe for colony hybridization<br><i>ebpB</i> probe             |
| Ef1093F: see above<br>Ef1093R: see above                                                                                             | Probe for colony hybridization<br><i>ebpC</i> probe             |

<sup>a</sup>Introduced restriction sites are underlined.

**Supplemental data related References**

1. Singh, K.V., Coque, T.M., Weinstock, G.M., and Murray, B.E. 1998. In vivo testing of an *Enterococcus faecalis* *efaA* mutant and use of *efaA* homologs for species identification. *FEMS Immunol Med Microbiol* 21:323-331.
2. Duh, R.W., Singh, K.V., Malathum, K., and Murray, B.E. 2001. *In vitro* activity of 19 antimicrobial agents against enterococci from healthy subjects and hospitalized patients and use of an *ace* gene probe from *Enterococcus faecalis* for species identification. *Microb Drug Resist* 7:39-46.
3. Nallapareddy, S.R., Singh, K.V., Duh, R.W., Weinstock, G.M., and Murray, B.E. 2000. Diversity of *ace*, a gene encoding a microbial surface component recognizing adhesive matrix molecules, from different strains of *Enterococcus faecalis* and evidence for production of *ace* during human infections. *Infect Immun* 68:5210-5217.
4. Link, A.J., Phillips, D., and Church, G.M. 1997. Methods for generating precise deletions and insertions in the genome of wild-type *Escherichia coli*: application to open reading frame characterization. *J Bacteriol* 179:6228-6237.
5. Murray, B.E., Singh, K.V., Ross, R.P., Heath, J.D., Dunny, G.M., and Weinstock, G.M. 1993. Generation of restriction map of *Enterococcus faecalis* OG1 and investigation of growth requirements and regions encoding biosynthetic function. *J Bacteriol* 175:5216-5223.
6. Singh, K.V., Qin, X., Weinstock, G.M., and Murray, B.E. 1998. Generation and testing of mutants of *Enterococcus faecalis* in a mouse peritonitis model. *J Infect Dis* 178:1416-1420.



7. Bryan, E.M., Bae, T., Kleerebezem, M., and Dunny, G.M. 2000. Improved vectors for nisin-controlled expression in gram-positive bacteria. *Plasmid* 44:183-190.
8. Mohamed, J.A., Huang, W., Nallapareddy, S.R., Teng, F., and Murray, B.E. 2004. Influence of origin of isolates, especially endocarditis isolates, and various genes on biofilm formation by *Enterococcus faecalis*. *Infect Immun* 72:3658-3663.
9. Toledo-Arana, A., Valle, J., Solano, C., Arrizubieta, M.J., Cucarella, C., Lamata, M., Amorena, B., Leiva, J., Penades, J.R., and Lasa, I. 2001. The enterococcal surface protein, Esp, is involved in *Enterococcus faecalis* biofilm formation. *Appl Environ Microbiol* 67:4538-4545.
10. Ton-That, H., and Schneewind, O. 2003. Assembly of pili on the surface of *Corynebacterium diphtheriae*. *Mol Microbiol* 50:1429-1438.
11. Ton-That, H., Marraffini, L.A., and Schneewind, O. 2004. Sortases and pilin elements involved in pilus assembly of *Corynebacterium diphtheriae*. *Mol Microbiol* 53:251-261.

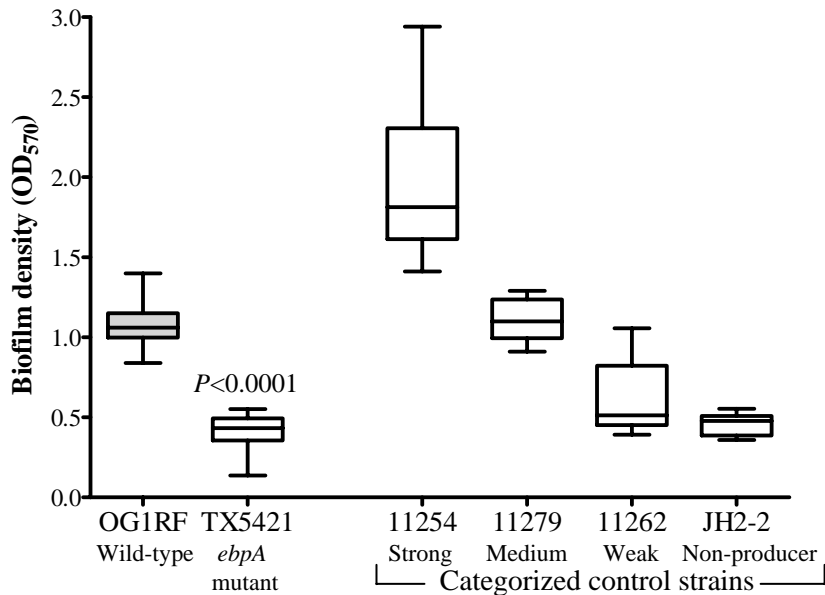

### Supplemental Figure 1

Biofilm formation of OG1RF and the *ebpA* disruption mutant (TX5421). Median and interquartile range values are shown. Values are from at least three independent experiments, each performed in quadruplicate. Previous studies (8, 9) reported the median OD<sub>570</sub> values for controls and these were >2 for *E. faecalis* strain 11254 (strong biofilm producer), 1 to 2 for strain 11279 (medium biofilm producer), 0.50 to < 1 for strain 11262 (weak biofilm producer), and ≤0.5 for strain JH2 (a non-biofilm producer).

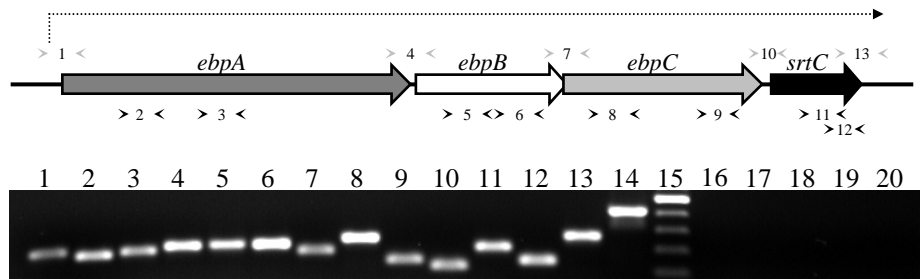

### Supplemental Figure 2

RT-PCR analysis of the *ebpA*, *B*, *C* and *srtC* gene cluster using RNA extracted from cells of *E. faecalis* strain OG1RF (wild-type). Directions and locations of open reading frames of the genomic region analyzed are indicated by arrows and the transcript is indicated by the dotted line. Grey arrow heads marked on the top of the schematic show the locations and directions of primer sets used to amplify intergenic regions (see Supplemental Table 2). Primer set numbers positioned within arrow heads correspond to the lane numbers of the gel. Black arrow heads marked on the bottom of the schematic show the locations and directions of primers that amplified intragenic regions of *ebpA*, *ebpB*, *ebpC*, and *srtC* (lanes 2 and 3, lanes 5 and 6, lanes 8 and 9 and lanes 11 and 12, respectively). Results revealed that *ebpA* is co-transcribed with *ebpB* (335 bp product with primer set Ef1091MDownF and Ef1092MR, lane 4), that *ebpB* is co-transcribed with *ebpC* (306 bp product with primer set Ef1092MDownF and Ef1093MR, lane 7), and that *ebpC* is co-transcribed with *srtC* (254 bp product with primer set Ef1093MDownFa and Ef1094MRa, lane 10). A 528-bp fragment of the house-keeping gene *gdh* (lane 14) amplified using the *gdhF* and *gdhR* primers (Supplemental Table 2) was used as a positive control for RT reactions. 100 bp DNA ladder (Invitrogen) was used as the size marker (lane 15). For the samples in lanes 16 to 19 with intragenic primer sets 2, 5, 8, and 11, respectively, and in lane 20 with intragenic primers for *gdh*, the reverse transcriptase was omitted (control for DNA contamination).

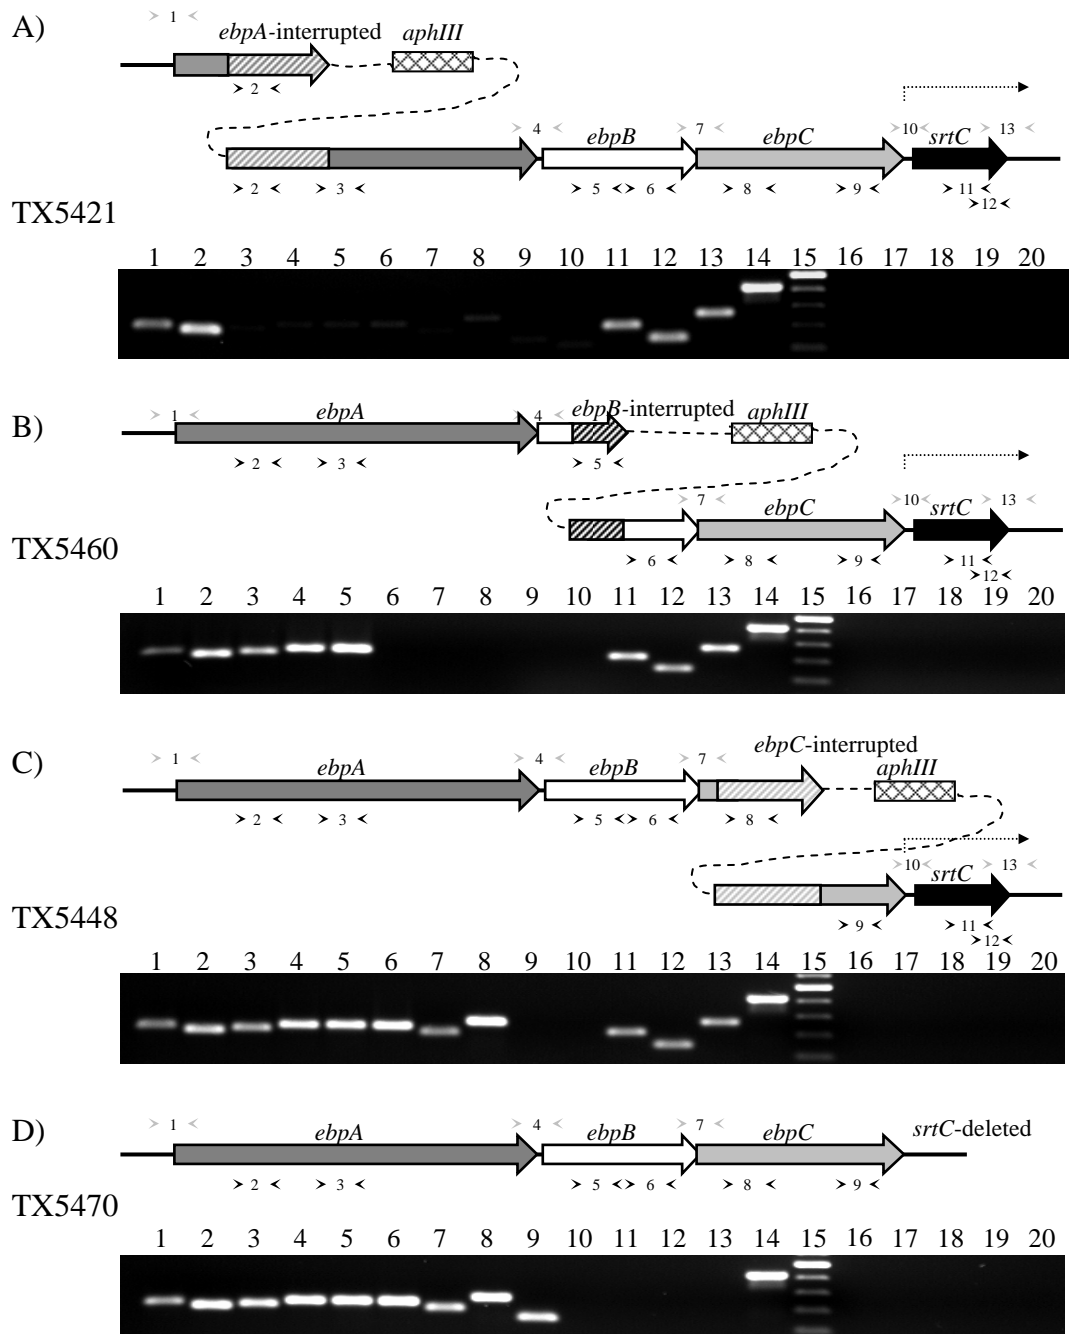

### Supplemental Figure 3

RT-PCR analysis of RNA extracted from cells of *ebpA* (panel A), *ebpB* (panel B), *ebpC* (panel C) disruption mutants and *srtC* deletion mutant (panel D) of *E. faecalis* OG1RF with primer sets specified in the Supplemental Figure 2.

Disruptions and deletion are schematically shown. Explanation for arrows and numbers is as described in the Supplemental Figure 2.

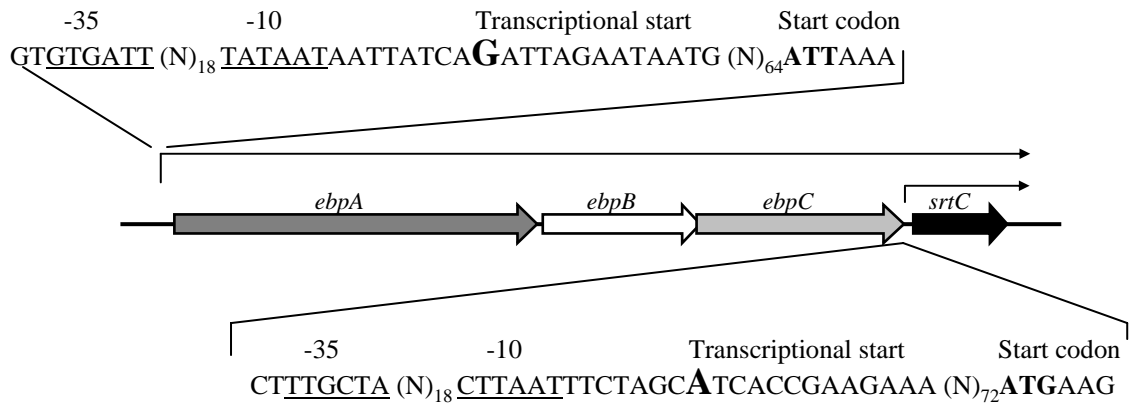

#### Supplemental Figure 4

Promoter regions of the *ebpABC-srtC* operon and the *srtC* gene. Regions that contained the putative promoters and transcriptional and translational start sites of the 8694-bp DNA are shown. Start codons are shown in bold type. For the *ebpA* gene, no recognizable ribosome-binding site (RBS) is present in the immediate vicinity of the predicted start codon, ATG, of the V583 genome database annotation. Hence, the most likely start codon is ATT (positioned 9 bp downstream of a suitable RBS) which is located 120 bp upstream (the first 84 bp codes for a signal peptide) of the current genome database annotation predicted start codon. RT-PCR analysis that defined the limits *ebp* operon supports this prediction. The predicted transcriptional start site for each of the transcripts is marked with a bigger font letter and putative promoters are underlined. Predicted RBS, GGAG (preceding the start codons of *ebpA* by 9 bp, *ebpB* by 10 bp, and *ebpC* by 7 bp) and GGAGGAA (preceding the start codon of *srtC* by 3-bp) are not shown.

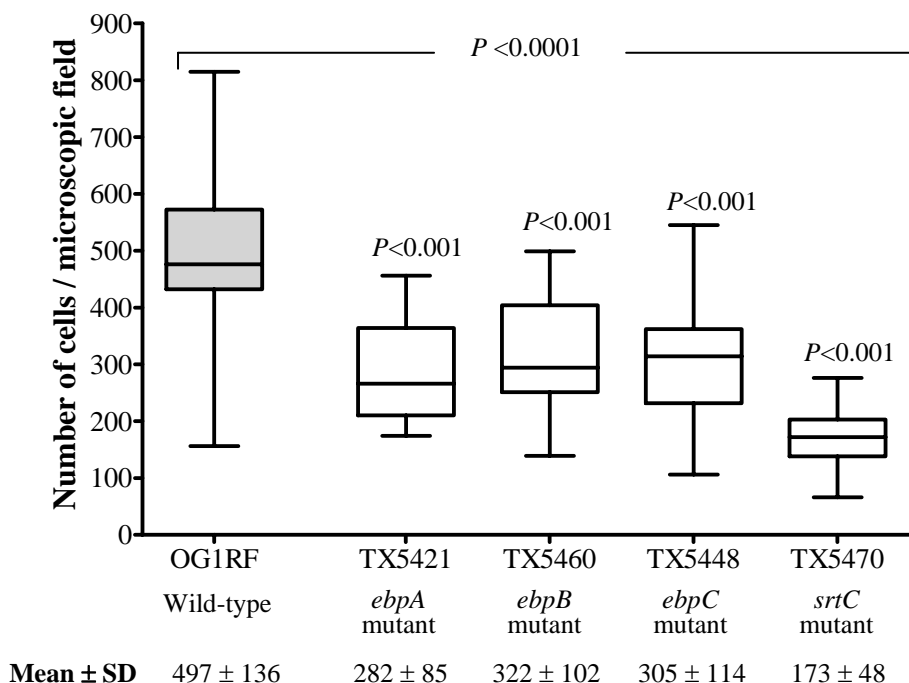

### Supplemental Figure 5

Primary adherence assay with wild-type *E. faecalis* strain OG1RF and its isogenic derivatives with mutations introduced into *ebp* and *srtC* genes. Median and interquartile range values are shown. Adherent bacterial cells quantified using 25 fields of phase-contrast microscope represent three independent experiments. Multiple sample medians generated from the primary attachment quantifications were compared using Kruskal-Wallis analysis of variance (nonparametric analysis of variance), with Dunn's multiple comparison post-test.  $P < 0.05$  was considered significant. Tests were performed by using GraphPad Prism v4 for Windows.

```

      *           *           *           *           50           *
EbpC : MKQLKKKVWYTSTLLLLLPLFTSVLGTTTAFAEENGESAQLVLHKKKMTD--LPDPLIQN : 58
EbpB : MKNAR--WLSICVMLLALFGFS-----QQALAEASQASVQVTLHKLLFPDGQLPE--QQN : 52

      *           *           *           100           *           *
EbpC : SGKEMSEFDKYQGLADVTFSIYNVTSEFYQRAAGASVDAAKQAVQSLTPGKPVAQGTTD : 118
EbpB : TGEEGTLLQNYRGLNDVTYQVYDVTDPFYQLRSE-----GK----- : 88

      *           *           150           *           *           *
EbpC : ANGNVTVQLPKKQNGKDAVYTIKEEPKEGVVAATNMVVAFPVYEMIKQADGSYKYGTEEL : 178
EbpB : -----TVQEAQRQ-----L----- : 97

      *           200           *           *           *           *
EbpC : AVVHIYPKNVVANDGSLHVKKVGTAENEGLNGAEFVISKSEGSPGTVKYIQGVKDGLYTW : 238
EbpB : -----AETGAMNRKPIAEDKTQTINGEDGVSFSLAS-----KD-----SQ : 133

      250           *           *           *           *           300
EbpC : TTDKEQAKRFITGKSYELIGENDFTEAENGTGELTVKNLEVGSYILEEVKAENNAELLENQ : 298
EbpB : QRDK--AYLFVEAEAPEV-----VKEKASNLVMLPVQDPQQSITHIH : 175

      *           *           *           *           350           *
EbpC : TKTPFTIEANNQTPVEKTVKNDTSKVDKTTPSLDGKDVAIGEKIKYQISVNIPLGHADKE : 358
EbpB : LYPKNEENAYDLPPLEKTVLDKQQGFNQ-----GEHINYQLTTQLPANLG-- : 221

      *           *           *           400           *           *
EbpC : GDANKYVVKFNLVDKHDAALTFDNVTSGEYAYALYDCDTVIAPENYQVTEQANGFTVAVNP : 418
EbpB : -----YQEFRLSDKADTLLLL--P--ESIEVKVAGKTVTT--GYTLLTQKHGFTLDFSI : 270

      *           *           450           *           *           *
EbpC : AYIPTLTPGGTLKFVFMHLNEKADPTKGFKNEAN-VDNGHTDDQTPPTVEVVTGGKRFI : 477
EbpB : KDLQNFAN-QTMTVSYQMRLEKTAEPDTAINNEGQLVTDKHTLTKR---AAVRTGGSFV : 326

      *           *           500           *           *           *
EbpC : KVDGDVTATQALAGASFVVRDNSDTANYLKIDETTKAATVVKTKAEATTFTTADGLVD : 537
EbpB : KVD--SENAKITLPEAVFIVKNQAG---EYLN--ETANGYRWQEKALAKKITSNQAGEFS : 380

      550           *           *           *           *           600
EbpC : ITGLKYGTYLEETVAPDDYVLLTNRIEFVVNEQSYGTENLVSPEKVPN---KHKCTLP : 594
EbpB : VKGLKDGQFLEEISAPKGYLLNQTELPFTVEKNSYATINGQRTAPLHVINKKVKESCFLP : 440

      *           *           *
EbpC : STGG-KGIYVYLGSGAVLLLIAGVYFARRRKENA-- : 627
EbpB : KINEERSIWLTIAGLLIIGMVVIWLFYQKQKRGERK : 476

```

## Supplemental Figure 6

Alignment of the complete amino acid sequences of EbpB and EbpC proteins. The alignment was performed using ClustalW (Lasergene software). Numbers on the top and at the right side of the alignment indicate the positions of the amino acid residues in the respective proteins. Identical residues are shaded in black and conservative substitutions are shaded in grey.

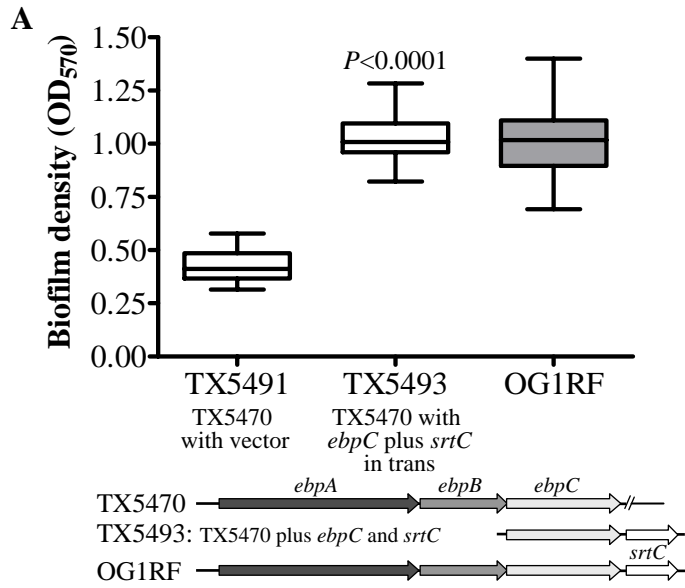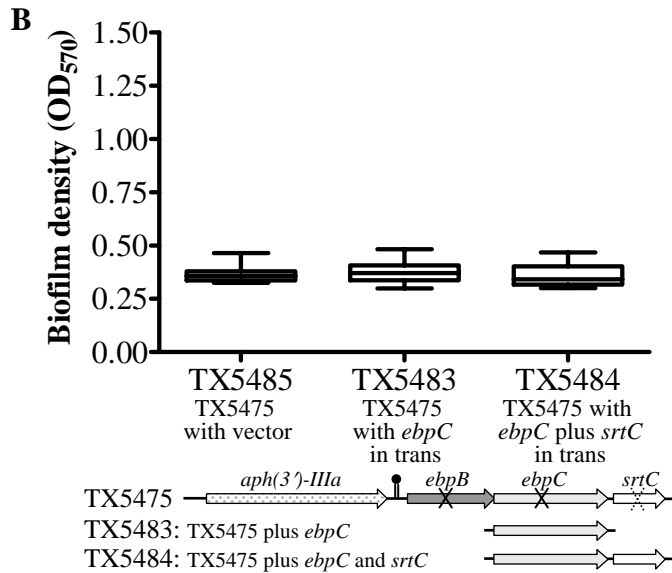



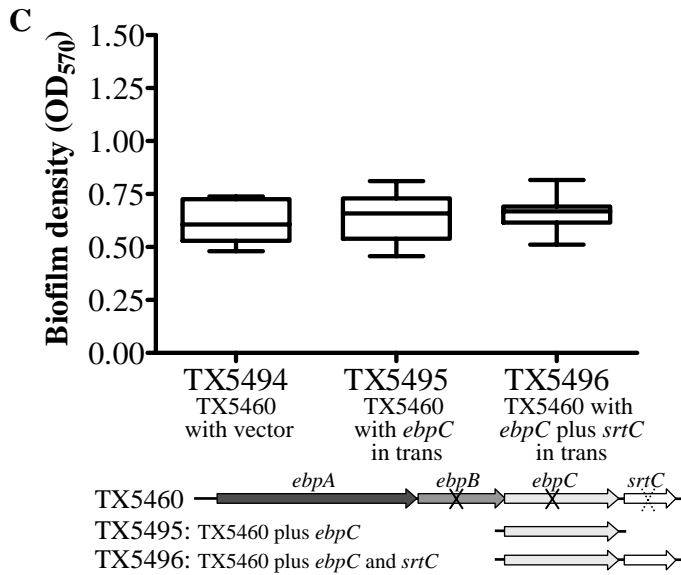

**Supplemental Figure 7**

Complementation studies. Biofilm formation after complementing A) the *srtC* deletion mutant with *ebpC* plus *srtC* cloned under control of the nisin inducible promoter of pMSP3545 (TX5493), B) *ebpA* deletion mutant with *ebpC* or *ebpC* plus *srtC* (TX5483 and TX5484, respectively), and C) the *ebpB* mutant with *ebpC* or *ebpC* plus *srtC* (TX5495 and TX5496, respectively). Median and interquartile range values are shown. Values are from at least three independent experiments, each performed in quadruplicate. The schematic below each panel illustrates the gene disruptions, deletions, and complementation fragments. Inactive *ebp* genes are cross marked with a solid line. Since the *srtC* gene is on two different transcripts, reduced transcription due to loss of *ebp-srtC* transcript is cross marked with dashed line. OD<sub>570</sub> medians from biofilm assays of complemented strains were compared with appropriate vector alone control strains using Mann-Whitney test and  $P < 0.05$  was considered significant. Tests were performed by using GraphPad Prism v4 for Windows.

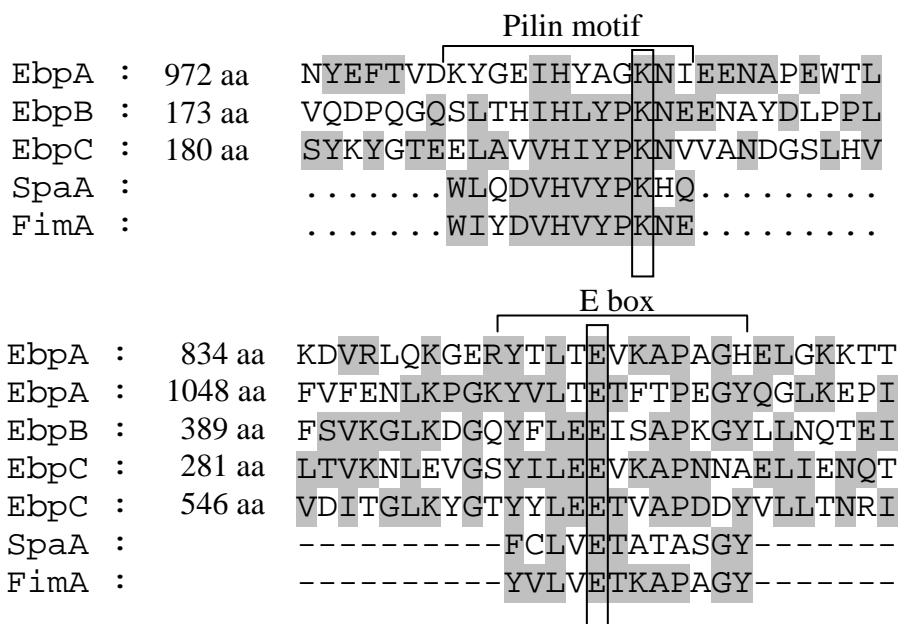

### Supplemental Figure 8

Conserved lysine (K) and glutamic acid (E) residues in pilin motif and E-box of *E. faecalis* Ebp proteins. Motifs common to all three Ebp proteins were identified with Genetics Computer Group (GCG) software package. Base position with respect to the start codon is shown for each motif. Similar motifs (pilin motif, WxxxVxVYPKN; E-box, YxLxETxAPxGY) were previously characterized in pilus-forming Spa proteins of *C. diphtheriae* and fimbriae forming Fim proteins of *Actinomyces naeslundii* (10, 11) and are shown here.
